# Supplementary material for: Cost-effectiveness of national health insurance programs in high-income countries: A systematic review
Source: PLoS One. 2017 Dec 15;12(12):e0189173. doi: 10.1371/journal.pone.0189173 (PMC5731747; doi:10.1371/journal.pone.0189173)
Supplement: S1 File — (XLSX) [file pone.0189173.s005.xlsx]

## Sheet: Results-from studies
Data Extraction Template					GRADE quality of evidence					Person extracting data:		SN
Extract date	Authors	Year of pub	Year of ref	Title	Oxford level evidence	Quality of evidence	Strength of recommendation	Types of publication	Country	Type of study	Scale of study	Study design	Participants	Type of insurance	Outcome	Unit of outcome	Outcom means	Outcome SD	Selected	Outcome CI	Monetary costs	Other costs
2015-04-30	von Wachter et al.	2008		The Employment Effects of Social Security Disability Insurance in the Past 25 Years: A Study of Rejected Applicants Using Administrative Data				Journal article	United States	Econometric analysis	Country	Others	People with disability	Disability insurance	Employment	Employment	0						Life expectancy
	Cutler et al.	2006	2002	The Value of Medical Spending in the United States, 1960 –2000				Journal article	United States	Econometric analysis	Country	Others	Whole population	Health insurance	Cost of life year	ICER	31600		Y				1960	1970	1980	1990	2000	Cumulative changes
																	53700					New born	69.9	70.76	73.88	75.37	76.87	6.97
																	84700					15yr	57.33	57.69	60.19	61.38	62.62	5.29
	Weathers&Stegman	2012		The effect of expanding access to health insurance on the health and mortality of Social Security Disability Insurance beneficiaries				Journal article	United States	Econometric analysis	Country	Before-after	Whole population	Other interventions	SF36 (MCS)	Others	2.9	1.09				45 yr	29.5	30.12	32.27	33.44	34.28	4.88
	Sommers et al.	2012		The effect of state medicaid expansions on mortality and insurance coverage among non-elderly adults				Journal article	United States	Others	Country	Double difference	Whole population	Health insurance	Mortality (deaths/100 k pop)	Others	-19.6					65 yr	14.39	15	16.51	17.28	17.86	3.47
	Sheu et al.	2014		The spillover effect of National Health Insurance on household consumption patterns: evidence from a natural experiment in Taiwan				Journal article	Taiwan	Others	Country	Double difference	Whole population	Health insurance	Consumption (spillover effects)	Others	0.0187						Health expenditure
	Bailey and weather	2014		The Accelerated Benefits Demonstration: Impacts on the Employment of Disability Insurance Beneficiaries				Journal article	United States	Econometric analysis	Country	With-without	Whole population	Other interventions	Employment	Employment	0.054					New born	13943	25528	37085	56120	83307	69364	19903.6
	Michalopoulos et al.	2012		The effects of health care benefits on health care use and health: a randomized trial for disability insurance beneficiaries				Journal article	United States	Others	Country	Randomized	People with disability	Disability insurance	Unmet medical need	Others	-0.2					15yr	18700	32704	47155	69457	102409	83790	31678.6
	Marie & Vall Castello	2011		Measuring the (Income) Effect of Disability Insurance Generosity on Labour Market Participation				Journal article	Netherlands	Econometric analysis	Country	Others	People with disability	Disability insurance	Elasticity of labour participation	Others	0.22					45 yr	17141	35266	63275	100983	148014	130873	53636.5
	Keng & Sheu	2013		The effect of national health insurance on mortality and the SES-health gradient: evidence from the elderly in Taiwan				Journal article	Taiwan	Econometric analysis	Country	Double difference	Whole population	Health insurance	Death hazard	Others	7-31%					65 yr	11495	34526	69819	116097	158549	147054	84757.3
	Engel	1994		Nine months German Statutory Health Insurance Structural Reform Law--effects and perspectives				Journal article	Germany	Others	Country	Others	Whole population	Health insurance	Drug cost	Others	-0.201												47494
	Campolieti	2004		Disability insurance benefits and labor supply: Some additional evidence				Journal article	Canada	Econometric analysis	State/province	Double difference	People with disability	Disability insurance	Labour supply	Others	0
	Bharmal & Thomas	2005		Health insurance coverage and health-related quality of life: Analysis of 2000 Medical Expenditure Panel Survey data				Journal article	United States	Econometric analysis	Country	With-without	Whole population	Health insurance	SF12 (PCS)	Others	-5.8	0.4
															SF12 (MCS)	Others	-1.1	0.4
	Baicker et al.	2014		The Impact of Medicaid on Labor Market Activity and Program Participation: Evidence from the Oregon Health Insurance Experiment				Journal article	United States	Cost-effectiveness analysis	State/province	Others	Whole population	Health insurance	Earnings	Others	-194.93	289			Control	0.8	Treatment
	Maestas et al.	2014		Disability Insurance and Health Insurance Reform: Evidence from Massachusetts				Journal article	United States	Econometric analysis	State/province	Before-after	Whole population	Health insurance	Disability application	Others	0.08	0.0152			QUALY	Cost	QUALY	Cost	ICER	Price index (2013=1)
2013	Muennig et al.	2015	2013	Considering whether medicaid is worth the cost: revisiting the Oregon health study				Journal article	United States	Cost-effectiveness analysis	State/province	With-without	Whole population	Health insurance	Cost effectiveness ratio	ICER	62000		Y	QALY	15.88	25500	15.901	26798	61677.4	1	61677.4	56675.8
2013	Muennig et al.	2015	2013	More money, fewer lives: the cost effectiveness of welfare reform in the United States				Journal article	United States	Cost-effectiveness analysis	Country	Others	Whole population	Other interventions	Cost effectiveness ratio	ICER	64000		Y	QALY	22	25500	22.44	53661	64002.3	1	64002.3
1994	Franks et al.	2005	1994	Is expanding Medicare coverage cost-effective?				Journal article	United States	Cost-effectiveness analysis	Country	Others	Whole population	Health insurance	Cost effectiveness ratio	ICER	24000		Y	QALY	10.06	34000	10.94	56000	25000	0.618666	40409.5
1994	Muennig et al.	2005	1994	The cost effectiveness of health insurance				Journal article	United States	Cost-effectiveness analysis	Country	Others	Whole population	Health insurance	ICER	ICER	35000		Y	QALY	21.7	17000	22.5	47000	37500	0.618666	60614.2	Original (in the calculation, 50% of gain was attributed to health care
																		Cutler	1970s	LY-New born	69.9	13943	70.33	25528	26941.9	0.767894	70.76
																		Using 1960 as the base		LY-15	57.33	18700	57.51	32704	77800	0.767894	57.69
																				LY-45	29.5	17141	29.81	35266	58467.7	0.767894	30.12
																				LY-65	14.39	11495	14.695	34526	75511.5	0.767894	15
																			Cutler 1980	LY-New born	69.9	13943	71.89	37085	11629.1	0.767894	73.88
																				LY-15	57.33	18700	58.76	47155	19898.6	0.767894	60.19
																				LY-45	29.5	17141	30.885	63275	33309.7	0.767894	32.27
	50																			LY-65	14.39	11495	15.45	69819	55022.6	0.767894	16.51
																			Culter 1990	LY-New born	69.9	13943	72.635	56120	15421.2	0.767894	75.37
																				LY-15	57.33	18700	59.355	69457	25065.2	0.767894	61.38
																				LY-45	29.5	17141	31.47	100983	42559.4	0.767894	33.44
																				LY-65	14.39	11495	15.835	116097	72388.9	0.767894	17.28
																			Culter 2000	LY-New born	69.9	13943	73.385	83307	19903.6	0.767894	76.87
																				LY-15	57.33	18700	59.975	102409	31648	0.767894	62.62
																				LY-45	29.5	17141	31.89	148014	54758.6	0.767894	34.28
																				LY-65	14.39	11495	16.125	158549	84757.3	0.767894	17.86
																		Using 1970 as the base	1980s	LY-New born	70.76	25528	72.32	37085	7408.33	0.767894	73.88
																				LY-15	57.69	32704	58.94	47155	11560.8	0.767894	60.19
																				LY-45	30.12	35266	31.195	63275	26054.9	0.767894	32.27
																				LY-65	15	34526	15.755	69819	46745.7	0.767894	16.51
																			1990s	LY-New born	70.76	25528	73.065	56120	13272	0.767894	75.37
																				LY-15	57.69	32704	59.535	69457	19920.3	0.767894	61.38
																				LY-45	30.12	35266	31.78	100983	39588.6	0.767894	33.44
																				LY-65	15	34526	16.14	116097	71553.5	0.767894	17.28
																			2000s	LY-New born	70.76	25528	73.815	83307	18912.9	0.767894	76.87
																				LY-15	57.69	32704	60.155	102409	28277.9	0.767894	62.62
																				LY-45	30.12	35266	32.2	148014	54205.8	0.767894	34.28
																				LY-65	15	34526	16.43	158549	86729.4	0.767894	17.86
																		Using 1980 as based	1990	LY-New born	73.88	37085	74.625	56120	25550.3	0.767894	75.37
																				LY-15	60.19	47155	60.785	69457	37482.4	0.767894	61.38
																				LY-45	32.27	63275	32.855	100983	64458.1	0.767894	33.44
																				LY-65	16.51	69819	16.895	116097	120203	0.767894	17.28
																			2000	LY-New born	73.88	37085	75.375	83307	30917.7	0.767894	76.87
																				LY-15	60.19	47155	61.405	102409	45476.5	0.767894	62.62
																				LY-45	32.27	63275	33.275	148014	84317.4	0.767894	34.28
																				LY-65	16.51	69819	17.185	158549	131452	0.767894	17.86
																		Using 1990 as based	2000	LY-New born	75.37	56120	76.12	83307	36249.3	0.767894	76.87
																				LY-15	61.38	69457	62	102409	53148.4	0.767894	62.62
																				LY-45	33.44	100983	33.86	148014	111979	0.767894	34.28
																				LY-65	17.28	116097	17.57	158549	146386	0.767894	17.86
																				This shaded box is the selected data for synthesis. They mainly from come from three studies.
																				Price index is calculated based on the average inflation rate between 1994-2014 (2.43%), which is
																				calcualted using data from here http://www.usinflationcalculator.com/inflation/historical-inflation-rates/

## Sheet: Sheet1
	Authors	Year of pub	Year of ref	Title	Oxford level evidence	Quality of evidence	Strength of recommendation	Types of publication	Country	Type of study	Scale of study	Study design	Participants	Type of insurance	Outcome	Unit of outcome	Outcom means	Outcome SD	Selected	Outcome CI	Monetary costs	Other costs
1	von Wachter et al.	2008		The Employment Effects of Social Security Disability Insurance in the Past 25 Years: A Study of Rejected Applicants Using Administrative Data				Journal article	United States	Econometric analysis	Country	Others	People with disability	Disability insurance	Employment	Employment	0						Life expectancy
2	Cutler et al.	2006	2002	The Value of Medical Spending in the United States, 1960 –2000				Journal article	United States	Econometric analysis	Country	Others	Whole population	Health insurance	Cost of life year	ICER	31600		Y				1960	1970	1980	1990	2000	Cumulative changes
3	Weathers&Stegman	2012		The effect of expanding access to health insurance on the health and mortality of Social Security Disability Insurance beneficiaries				Journal article	United States	Econometric analysis	Country	Before-after	Whole population	Other interventions	SF36 (MCS)	Others	2.9	1.09				45 yr	29.5	30.12	32.27	33.44	34.28	4.88
4	Sommers et al.	2012		The effect of state medicaid expansions on mortality and insurance coverage among non-elderly adults				Journal article	United States	Others	Country	Double difference	Whole population	Health insurance	Mortality (deaths/100 k pop)	Others	-19.6					65 yr	14.39	15	16.51	17.28	17.86	3.47
5	Sheu et al.	2014		The spillover effect of National Health Insurance on household consumption patterns: evidence from a natural experiment in Taiwan				Journal article	Taiwan	Others	Country	Double difference	Whole population	Health insurance	Consumption (spillover effects)	Others	0.0187						Health expenditure
6	Bailey and weather	2014		The Accelerated Benefits Demonstration: Impacts on the Employment of Disability Insurance Beneficiaries				Journal article	United States	Econometric analysis	Country	With-without	Whole population	Other interventions	Employment	Employment	0.054					New born	13943	25528	37085	56120	83307	69364	#REF!
7	Michalopoulos et al.	2012		The effects of health care benefits on health care use and health: a randomized trial for disability insurance beneficiaries				Journal article	United States	Others	Country	Randomized	People with disability	Disability insurance	Unmet medical need	Others	-0.2					15yr	18700	32704	47155	69457	102409	83790	#REF!
8	Marie & Vall Castello	2011		Measuring the (Income) Effect of Disability Insurance Generosity on Labour Market Participation				Journal article	Netherlands	Econometric analysis	Country	Others	People with disability	Disability insurance	Elasticity of labour participation	Others	0.22					45 yr	17141	35266	63275	100983	148014	130873	53636.5
9	Keng & Sheu	2013		The effect of national health insurance on mortality and the SES-health gradient: evidence from the elderly in Taiwan				Journal article	Taiwan	Econometric analysis	Country	Double difference	Whole population	Health insurance	Death hazard	Others	7-31%					65 yr	11495	34526	69819	116097	158549	147054	84757.3
10	Engel	1994		Nine months German Statutory Health Insurance Structural Reform Law--effects and perspectives				Journal article	Germany	Others	Country	Others	Whole population	Health insurance	Drug cost	Others	-0.201												#REF!
11	Campolieti	2004		Disability insurance benefits and labor supply: Some additional evidence				Journal article	Canada	Econometric analysis	State/province	Double difference	People with disability	Disability insurance	Labour supply	Others	0
12	Bharmal & Thomas	2005		Health insurance coverage and health-related quality of life: Analysis of 2000 Medical Expenditure Panel Survey data				Journal article	United States	Econometric analysis	Country	With-without	Whole population	Health insurance	SF12 (PCS)	Others	-5.8	0.4
13	Baicker et al.	2014		The Impact of Medicaid on Labor Market Activity and Program Participation: Evidence from the Oregon Health Insurance Experiment				Journal article	United States	Cost-effectiveness analysis	State/province	Others	Whole population	Health insurance	Earnings	Others	-194.93	289			Control	0.8	Treatment
14	Maestas et al.	2014		Disability Insurance and Health Insurance Reform: Evidence from Massachusetts				Journal article	United States	Econometric analysis	State/province	Before-after	Whole population	Health insurance	Disability application	Others	0.08	0.0152			QUALY	Cost	QUALY	Cost	ICER	Price index (2013=1)
15	Muennig et al.	2015	2013	Considering whether medicaid is worth the cost: revisiting the Oregon health study				Journal article	United States	Cost-effectiveness analysis	State/province	With-without	Whole population	Health insurance	Cost effectiveness ratio	ICER	62000		Y	QALY	15.88	25500	15.901	26798	61677.4	1	61677.4	56675.8
16	Muennig et al.	2015	2013	More money, fewer lives: the cost effectiveness of welfare reform in the United States				Journal article	United States	Cost-effectiveness analysis	Country	Others	Whole population	Other interventions	Cost effectiveness ratio	ICER	64000		Y	QALY	22	25500	22.44	53661	64002.3	1	64002.3
17	Franks et al.	2005	1994	Is expanding Medicare coverage cost-effective?				Journal article	United States	Cost-effectiveness analysis	Country	Others	Whole population	Health insurance	Cost effectiveness ratio	ICER	24000		Y	QALY	10.06	34000	10.94	56000	25000	0.618666	40409.5
18	Muennig et al.	2005	1994	The cost effectiveness of health insurance				Journal article	United States	Cost-effectiveness analysis	Country	Others	Whole population	Health insurance	ICER	ICER	35000		Y	QALY	21.7	17000	22.5	47000	37500	0.618666	60614.2	Original (in the calculation, 50% of gain was attributed to health care
13	Eichler et al.	2004		Use of Cost-Effectiveness Analysis in Health-Care Resource Allocation Decision-Making: How Are Cost-Effectiveness Thresholds Expected to Emerge?											SF12 (MCS)	Others	-1.1	0.4
